# Supplementary material for: A novel approach using C. elegans DNA damage-induced apoptosis to characterize the dynamics of uptake transporters for therapeutic drug discoveries
Source: Sci Rep. 2016 Oct 27;6:36026. doi: 10.1038/srep36026 (PMC5081529; doi:10.1038/srep36026)
Supplement: Supplementary Information [file srep36026-s2.pdf]

**Supplemental information****Title: A novel approach using *C. elegans* DNA damage-induced apoptosis to characterize the dynamics of uptake transporters for therapeutic drug discoveries**

Arturo Papaluca and Dindial Ramotar

**Table S1a:** Threading template structures used for predicting *C. elegans* OCT-1

| Rank <sup>a</sup> | PDB Hit <sup>b</sup> | Protein name <sup>c</sup>                                        | Specie <sup>d</sup>               | Identity 1 <sup>e</sup> | Identity 2 <sup>e</sup> | Normalized Z-Score <sup>f</sup> | Method <sup>g</sup> |
|-------------------|----------------------|------------------------------------------------------------------|-----------------------------------|-------------------------|-------------------------|---------------------------------|---------------------|
| 1                 | 5c65A                | GLUT3 / SLC2A3                                                   | <i>Homo sapiens</i>               | 0.18                    | 0.20                    | 1.48                            | X-Ray diffraction   |
| 2                 | 4gbyA                | MFS (major facilitator superfamily) proton:xylose symporter Xyle | <i>Escherichia coli</i>           | 0.20                    | 0.17                    | 3.09                            | X-Ray diffraction   |
| 3                 | 5c65A                | GLUT3 / SLC2A3                                                   | <i>Homo sapiens</i>               | 0.18                    | 0.20                    | 2.38                            | X-Ray diffraction   |
| 4                 | 4pypA                | GLUT1                                                            | <i>Homo sapiens</i>               | 0.18                    | 0.19                    | 3.51                            | X-Ray diffraction   |
| 5                 | 4pypA                | GLUT1                                                            | <i>Homo sapiens</i>               | 0.18                    | 0.19                    | 2.86                            | X-Ray diffraction   |
| 6                 | 5c65A                | GLUT3 / SLC2A3                                                   | <i>Homo sapiens</i>               | 0.17                    | 0.20                    | 2.16                            | X-Ray diffraction   |
| 7                 | 4gc0A                | MFS (major facilitator superfamily) proton:xylose symporter Xyle | <i>Escherichia coli</i>           | 0.18                    | 0.17                    | 4.17                            | X-Ray diffraction   |
| 8                 | 4gc0A                | MFS (major facilitator superfamily) proton:xylose symporter Xyle | <i>Escherichia coli</i>           | 0.18                    | 0.17                    | 3.40                            | X-Ray diffraction   |
| 9                 | 4ldsA                | Inward-facing structure of glucose transporter                   | <i>Staphylococcus epidermidis</i> | 0.21                    | 0.18                    | 1.44                            | X-Ray diffraction   |
| 10                | 4ldsA                | Inward-facing structure of glucose transporter                   | <i>Staphylococcus epidermidis</i> | 0.21                    | 0.18                    | 1.31                            | X-Ray diffraction   |

**Table S1b:** Threading template structures used for predicting *C. elegans* OCT-2

| Rank <sup>a</sup> | PDB Hit <sup>b</sup> | Protein name <sup>c</sup>                         | Specie <sup>d</sup> | Identity 1 <sup>e</sup> | Identity 2 <sup>e</sup> | Normalized Z-Score <sup>f</sup> | Method <sup>g</sup> |
|-------------------|----------------------|---------------------------------------------------|---------------------|-------------------------|-------------------------|---------------------------------|---------------------|
| 1                 | 5c65A                | GLUT3 / SLC2A3                                    | <i>Homo sapiens</i> | 0.18                    | 0.16                    | 1.53                            | X-Ray diffraction   |
| 2                 | 4gbyA                | MFS (major facilitator superfamily) proton:xylose | <i>Homo sapiens</i> | 0.18                    | 0.18                    | 2.92                            | X-Ray diffraction   |

|    |       |                                                                  |                                   |      |      |      |                   |
|----|-------|------------------------------------------------------------------|-----------------------------------|------|------|------|-------------------|
|    |       | symporter Xyle                                                   |                                   |      |      |      |                   |
| 3  | 5c65A | GLUT3 / SLC2A3                                                   | <i>Escherichia coli</i>           | 0.17 | 0.16 | 2.38 | X-Ray diffraction |
| 4  | 4pypA | GLUT1                                                            | <i>Homo sapiens</i>               | 0.18 | 0.16 | 3.46 | X-Ray diffraction |
| 5  | 4gc0A | MFS (major facilitator superfamily) proton:xylose symporter Xyle | <i>Escherichia coli</i>           | 0.18 | 0.18 | 2.86 | X-Ray diffraction |
| 6  | 5c65A | GLUT3 / SLC2A3                                                   | <i>Escherichia coli</i>           | 0.16 | 0.16 | 2.18 | X-Ray diffraction |
| 7  | 4gc0A | MFS (major facilitator superfamily) proton:xylose symporter Xyle | <i>Escherichia coli</i>           | 0.17 | 0.18 | 4.21 | X-Ray diffraction |
| 8  | 4gc0A | MFS (major facilitator superfamily) proton:xylose symporter Xyle | <i>Escherichia coli</i>           | 0.19 | 0.18 | 4.28 | X-Ray diffraction |
| 9  | 5c65A | GLUT3 / SLC2A3                                                   | <i>Escherichia coli</i>           | 0.18 | 0.16 | 1.51 | X-Ray diffraction |
| 10 | 4ldsA | Glucose transporter                                              | <i>Staphylococcus epidermidis</i> | 0.22 | 0.16 | 2.55 | X-Ray diffraction |

<sup>a</sup>Rank of templates represents the top ten threading templates used by I-TASSER.

<sup>b</sup>PDB Hit IDs from reported protein structures used as threading templates.

<sup>c</sup>Identity 1 and 2 are the percentage sequence identity of the templates in the threading aligned region with the query sequence.

<sup>d</sup>Normalized Z-score is the normalized Z-score of the threading alignments. Alignment with a Z-score >1 signifies a correct alignment.

<sup>e</sup>Method used to resolved the crystal structure.

<sup>f</sup>The top 10 alignments reported above (in order of their ranking) are from the following threading programs: 1: MUSTER 2: FFAS-3D 3: SPARKS-X 4: HHSEARCH2 5: HHSEARCH I 6: Neff-PPAS 7: HHSEARCH 8: pGenTHREADER 9: wdPPAS 10: cdPPAS.

**Table S2a:** Top 10 identified structural analogs in PDB database for OCT-1

| Rank <sup>a</sup> | PDB Hit <sup>b</sup> | TM-score <sup>c</sup> | RMSD <sup>d</sup> | Identity <sup>e</sup> | Coverage <sup>f</sup> |
|-------------------|----------------------|-----------------------|-------------------|-----------------------|-----------------------|
| 1                 | 5c65A                | 0.713                 | 2.15              | 0.172                 | 0.756                 |
| 2                 | 4pypA                | 0.689                 | 2.00              | 0.184                 | 0.723                 |
| 3                 | 4gbyA                | 0.675                 | 2.58              | 0.147                 | 0.732                 |
| 4                 | 4ldsA                | 0.628                 | 2.70              | 0.190                 | 0.685                 |
| 5                 | 4j05A                | 0.583                 | 3.18              | 0.194                 | 0.644                 |
| 6                 | 3wdoA                | 0.573                 | 3.79              | 0.106                 | 0.665                 |
| 7                 | 4zowA                | 0.560                 | 3.35              | 0.131                 | 0.632                 |
| 8                 | 1pw4A                | 0.553                 | 4.17              | 0.102                 | 0.663                 |
| 9                 | 4w6vA                | 0.552                 | 4.23              | 0.076                 | 0.658                 |
| 10                | 4ikvA                | 0.546                 | 4.23              | 0.072                 | 0.655                 |

**Table S2b:** Top 10 identified structural analogs in PDB database for OCT-2

| Rank <sup>a</sup> | PDB Hit <sup>b</sup> | TM-score <sup>c</sup> | RMSD <sup>d</sup> | Identity <sup>e</sup> | Coverage <sup>f</sup> |
|-------------------|----------------------|-----------------------|-------------------|-----------------------|-----------------------|
| 1                 | 4gc0A                | 0.675                 | 1.63              | 0.182                 | 0.694                 |
| 2                 | 5c65A                | 0.670                 | 2.19              | 0.165                 | 0.707                 |
| 3                 | 4ybqA                | 0.643                 | 2.54              | 0.181                 | 0.686                 |
| 4                 | 4pypA                | 0.593                 | 3.54              | 0.151                 | 0.675                 |
| 5                 | 4ldsA                | 0.564                 | 3.62              | 0.175                 | 0.646                 |
| 6                 | 3wdoA                | 0.556                 | 3.43              | 0.122                 | 0.624                 |
| 7                 | 4j05A                | 0.551                 | 3.47              | 0.163                 | 0.616                 |
| 8                 | 3o7qA                | 0.533                 | 3.28              | 0.115                 | 0.597                 |
| 9                 | 4zowA                | 0.518                 | 3.90              | 0.108                 | 0.603                 |
| 10                | 4m64A                | 0.511                 | 4.46              | 0.120                 | 0.617                 |

<sup>a</sup>Rank of templates represents the top ten threading templates used by I-TASSER.

<sup>b</sup>PDB Hit IDs from reported protein structures used as threading templates.

<sup>c</sup>TM-score is a metric for measuring the structural similarity of two protein models. It is designed to solve two major problems in the traditional metrics such as root-mean-square deviation (RMSD): (1) TM-score measures the global fold similarity and is less sensitive to the local structural variations; (2) magnitude of TM-score for random structure pairs is length-independent. TM-score has the value in [0,1], where 1 indicates a perfect match between two structures. Following strict statistics of structures in the PDB, scores below 0.17 corresponds to randomly chosen unrelated proteins whereas with a score higher than 0.5 assume generally the same fold in SCOP/CATH.

<sup>d</sup>RMSD is the root-mean-square deviation between residues that are structurally aligned by TM-align.

<sup>e</sup>Identity is the percentage sequence identity in the structurally aligned region.

<sup>f</sup>Coverage represents the coverage of the alignment by TM-align and is equal to the number of structurally aligned residues divided by length of the query protein.

**Table S3:** Confidence measurement of *C. elegans* OCT-1 and OCT-2 structures computed with I-TASSER, and after structural refinement with ModRefiner and Modeller

| Protein          | I-TASSER             |                   |                       | ModRefiner        |                       | Modeller            |
|------------------|----------------------|-------------------|-----------------------|-------------------|-----------------------|---------------------|
|                  | C-score <sup>a</sup> | RMSD <sup>b</sup> | TM-score <sup>c</sup> | RMSD <sup>b</sup> | TM-score <sup>d</sup> | Z-DOPE <sup>e</sup> |
| OCT-1 (F52F12.1) | -2.35                | 13.4±4.0Å         | 0.44±0.14             | 25.78             | 0.24                  | -1.765              |
| OCT-2 (ZK455.8)  | -2.52                | 14.1±3.8Å         | 0.42±0.14             | 18.03             | 0.35                  | -0.472              |

<sup>a</sup>C-score is a confidence score for estimating the quality of predicted models by I-TASSER. C-score range between [-5 and 2], where a C-score of higher value signifies a model with a high confidence.

<sup>b</sup>RMSD is the root-mean-square deviation between residues that are structurally aligned<sup>1</sup>.

TM-score is the metric for measuring the structural similarity of two protein models. <sup>c</sup>TM-score is based on their correlation with I-Tasser's C-score, and ModRefiner <sup>d</sup>TM-score indicates a model of correct topology whose value range between [ $>0.5$  and  $<0.17$ ].

<sup>e</sup>Z-DOPE is the atomic distance-dependent statistical calculation from samples of native protein structures. Protein structures computed lower than -1, score as native-like structures.

**Table S4:** Predicted amino acid positions for ligand-protein interaction:

| Protein | Residues                                                                                          | C-score <sup>a</sup> |
|---------|---------------------------------------------------------------------------------------------------|----------------------|
| OCT-1   | 63, 64, 67, 72, 73, 75, 155, 162, 219, 223, 367, 370, 374, 375, 379, 382, 389, 392, 459, 490, 494 | 0.38                 |

|       |                                                                              |      |
|-------|------------------------------------------------------------------------------|------|
| OCT-2 | 58, 188, 62, 270, 273, 274, 277, 389, 390, 394, 426, 482, 483, 490, 514, 517 | 0.75 |
|-------|------------------------------------------------------------------------------|------|

<sup>a</sup>C-score is the confidence score of predicted binding site. Scores falls in between 0-1; where a score close or equal to 1 signifies a reliable prediction. Amino acids in blue are the ones forming polar contacts with doxorubicin (Fig. 4c).

**Table S5:** Computed ligand-protein docking scores with BSP-SLIM:

| Drug        | OCT-1                      |                               | OCT-2                      |                                       |
|-------------|----------------------------|-------------------------------|----------------------------|---------------------------------------|
|             | Docking score <sup>a</sup> | Predicted amino acids         | Docking score <sup>a</sup> | Predicted amino acids                 |
| Doxorubicin | 3.805                      | Pro63, Tyr162, Asn370, Asn375 | 3.993                      | Asn58, Tyr188, Trp273, Tyr490, Arg514 |
| Diclofenac  | 0                          | 0                             | 0                          | 0                                     |

<sup>a</sup>Docking score is the confidence score of predicted ligand-protein docking. Scores higher than 1 are considered being a reliable docking.

**Table S6:** Mechanism of action of the drugs used in this study

| Ligand           | Mechanism of action                                                                                                                                                                                                                                                                                                                                         | PubChem CID |
|------------------|-------------------------------------------------------------------------------------------------------------------------------------------------------------------------------------------------------------------------------------------------------------------------------------------------------------------------------------------------------------|-------------|
| 1. B02           | RAD51 inhibitor resulting in unrepaired double strand breaks.                                                                                                                                                                                                                                                                                               | 5738263     |
| 2. Camptothecin  | Inhibits the nuclear enzyme DNA Topoisomerase I.                                                                                                                                                                                                                                                                                                            | 24360       |
| 3. Cisplatin     | Produce intra and interstrand DNA crosslinks.                                                                                                                                                                                                                                                                                                               | 441203      |
| 4. Cycloheximide | Inhibits elongation during protein synthesis.                                                                                                                                                                                                                                                                                                               | 6197        |
| 5. Diclofenac    | Non-steroidal anti-inflammatory agent                                                                                                                                                                                                                                                                                                                       | 3033        |
| 6. Doxorubicin   | Intercalates between base pairs in the DNA helix, thereby preventing DNA replication and inhibiting protein synthesis. Inhibits Topoisomerase II.                                                                                                                                                                                                           | 31703       |
| 7. Ketamine      | Induction of anesthesia                                                                                                                                                                                                                                                                                                                                     | 3821        |
| 8. Melphalan     | Alkylates DNA at the N7 position of guanine and induces DNA interstrand crosslinkages, resulting in the inhibition of DNA and RNA synthesis and cytotoxicity against both dividing and non-dividing tumor cells.                                                                                                                                            | 460612      |
| 9. Metformin     | Decrease hepatic glucose production, mostly through a mild and transient inhibition of the mitochondrial respiratory-chain complex 1. Binds to and inhibits the enzyme dihydrofolate reductase, resulting in inhibition of purine nucleotide and thymidylate synthesis and, subsequently, inhibition of DNA and RNA syntheses. Induce oxidative DNA damage. | 4091        |
| 10. Methotrexate | Binds to apurinic/apyrimidinic (AP) DNA                                                                                                                                                                                                                                                                                                                     | 126941      |
| 11. Methoxyamine | Binds to apurinic/apyrimidinic (AP) DNA                                                                                                                                                                                                                                                                                                                     | 4113        |

|     |                          |                                                                                                                                                                                                                                                                                                                                                     |          |
|-----|--------------------------|-----------------------------------------------------------------------------------------------------------------------------------------------------------------------------------------------------------------------------------------------------------------------------------------------------------------------------------------------------|----------|
|     |                          | damage sites and inhibits base excision repair (BER), which may result in an increase in DNA strand breaks.                                                                                                                                                                                                                                         |          |
| 12. | Methyl methanesulfonate  | Acts as a mutagen by altering and damaging DNA producing distinct types of lesions. Acts as a chemo- and radio-sensitizing agent by enhancing tumor blood flow, thereby reducing tumor hypoxia. This agent also inhibits poly(ADP-ribose) polymerases, enzymes involved in the rejoining of DNA strand breaks induced by radiation or chemotherapy. | 4156     |
| 13. | Nicotinamide             | 4-NQO and its metabolite 4-Hydroxyaminoquinolone-1-oxide bind to nucleic acids.                                                                                                                                                                                                                                                                     | 936      |
| 14. | 4-Nitroquinoline N-oxide | Inhibits PARP-mediated repair of single strand DNA breaks; also enhance the cytotoxicity of DNA-damaging agents.                                                                                                                                                                                                                                    | 5955     |
| 15. | Olaparib                 | Catalyze the formation of reactive oxygen species (ROS), more specifically, the superoxide free radical. Paraquat will undergo redox cycling in vivo, being reduced by an electron donor such as NADPH, before being oxidized by an electron receptor such as dioxygen to produce superoxide, a major ROS.                                          | 23725625 |
| 16. | Paraquat                 | Hypoglycemic agent closely related to metformin.                                                                                                                                                                                                                                                                                                    | 15939    |
| 17. | Phenformin               | Acting as an analog of the 3' terminal end of aminoacyl-tRNA, puromycin incorporates itself into a growing polypeptide chain and causes its premature termination, thereby inhibiting protein synthesis and producing oxidative damages.                                                                                                            | 8249     |
| 18. | Puromycin                | Acts by intercalating into DNA and induces DNA double strand breaks.                                                                                                                                                                                                                                                                                | 439530   |
| 19. | Zeocin                   |                                                                                                                                                                                                                                                                                                                                                     | 71668282 |

**Title: A novel approach using *C. elegans* DNA damage-induced apoptosis to characterize the dynamics of uptake transporters for therapeutic drug discoveries**

Arturo Papaluca and Dindial Ramotar

**Legends for Supplemental Figures**

**Figure S1.** Sequence alignment of members belonging to the family of organic cation transporters from *C. elegans* (CeOCT-1 and CeOCT-2), *Homo sapiens* (hOCT1 and hOCT2) and *Mus musculus* (mOCT1 and mOCT2). Numbers indicate amino acid positions. Identical or similar amino acid residues amongst the members are shaded in black or gray, respectively. Dashes indicate gaps. The stretch of amino acid residues, PESPRW (consensus in red), is the longest identical region in all six transporters. CeOCT-2 contains the four conserved cysteine residues Cys203, 250, 280 and 302 present in the N-terminus of each member. The OCT2 from the different species lack the conserved cysteine Cys49, Cys27, and Cys27 present in the OCT1 members CeOCT-1, hOCT1 and mOCT1, respectively.

**Figure S2.** Relative gene expression. (A) *oct-1* and *oct-2* gene expression are downregulated by the *oct-1(RNAi)* and *oct-2(RNAi)*, respectively. (B) *pes-23* gene expression is not affected by either *oct-1(RNAi)* and *oct-2(RNAi)*. The RNA expression was measured as described in the experimental procedures.

**Figure S3.** *oct-1* and *oct-2* gene expression data measured (A) across all developmental stages and (B) hermaphrodite soma and hermaphrodite gonads. The *oct-1* (WBGene00003842) and *oct-2* (WBGene00003843) RNA expression data was extracted from the Wormbase/SPeLL database.

**Figure S4.** OCT-2-dependent doxorubicin uptake into the pharynx of *C. elegans* is not affected by the eating defective *eat-2(ad453)* mutant animals. Experiment is represented by ‘fire’ look-up images of the pharynx from eating defective *eat-2(ad453)* untreated and doxorubicin treated animals. The respective DIC images are shown in the upper left corner of each panel. Images to the right of each pharynx depict a 3D representation of the doxorubicin (100  $\mu$ M) treatment signal intensity for the indicated genotypes. Data are representative of experiments performed in duplicates (n = 15). Enlargement of the pharynx is represented by a scale bar = 10  $\mu$ m. Fluorescence posterior to the pharynx is auto-fluorescence detected from the intestine.

**Figure S5.** Genetic analysis of doxorubicin- and cisplatin-induced apoptotic cell death. (A) Representative images of wild type\*, *cep-1*, *egl-1*, *ced-9*, *ced-4* and *ced-3* mutant animals untreated and RNAi-driven depletion of *oct-1* exposed to 100  $\mu$ M doxorubicin. Apoptotic cells were observed and quantified as described in the experimental procedures. (B) Apoptotic pathway in *C. elegans* (C) Data shown represent the average quantification of three independent experiments (n = 30). \*Images from Figure 2 were used for comparison purposes.

**Figure S6.** Methyl methanesulfonate and Gamma rays ( $\gamma$ -rays)-induced germ cell apoptosis are independent of OCT-1 and OCT-2 function. (A and C) Box and whisker plots depict quantification of apoptotic cell corpses upon MMS (0.25  $\mu$ M) and  $\gamma$ -rays (75 grays) treatment, respectively. (B) Representative images of right gonad arms after exposure to  $\gamma$ -rays. Posterior is right. The results are the averages from three independent

experiments (n = 30) Mann-Whitney U-test (\*P<0.05; \*\*P<0.01; \*\*\*P<0.001; \*\*\*\*P<0.0001 and N.S. = Non Significant).

**Figure S7.** RNAi-driven downregulation of *oct-1* upregulates *oct-2* expression and sensitizes *C. elegans* DNA repair deficient mutants to drug-induced apoptotic cell death. (A) Wild type. (B and C) The homologous recombination mutant *rad-51(ok2218)* downregulated for *oct-1* shows stimulated doxorubicin-induced apoptotic cell death. (D and E) The base excision repair mutant *apn-1(tm6691)* downregulated for *oct-1* displays enhanced spontaneous, as well as doxorubicin-induced apoptotic cell death. (F and G and H and I) The nucleotide excision and mismatch repair defective mutants, *xpa-1(ok698)* and *msh-2(ok2410)*, respectively, downregulated for *oct-1* exhibit enhanced cisplatin-induced apoptotic cell death. Treatment with doxorubicin (100  $\mu$ M, red boxes) and cisplatin (100  $\mu$ M, blue boxes) started with L1-staged animals. Apoptotic cell corpses were analysed in young adult staged animals. Untreated animals are depicted as white boxes. The results are the averages from three independent experiments (n = 30 each). Mann-Whitney U-test of mean difference (\*P<0.05; \*\*P<0.01; \*\*\*P<0.001 and \*\*\*\*P<0.0001) was calculated. (J - M) RNAi-driven downregulation of *oct-1* upregulates *oct-2* in the wild type and the DNA repair defective mutants. The Y-axis represents the same scale for *oct-1* and *oct-2* gene expression in all genotypes.

**Figure S8.** Structural modeling prediction of (A) OCT-1 and (B) OCT-2 computed with ResQ. The predicted Normalized B-factor and estimated residues accuracy in Ångstrom

were computed based on the I-TASSER models. The twelve transmembrane domains are represented as red bars at the bottom of each panel.

**Figure S9.** Apoptotic cell corpses as a function of cisplatin concentrations. At 25  $\mu\text{M}$  of cisplatin, apoptotic cell corpses were induced in the *oct-1(ok1051)* mutant, but not in the wild type.

# Title: A novel approach using *C. elegans* DNA damage-induced apoptosis to characterize the dynamics of uptake transporters for therapeutic drug discoveries

Arturo Papaluca and Dindial Ramotar

|           |     |                                                                      |                     |
|-----------|-----|----------------------------------------------------------------------|---------------------|
| CeOCT-1   | 1   | MSFQAMETFAEISQEILMSATKP                                              | P-D-----FDFVLEQVGNY |
| CeOCT-2   | 1   | M-----N-QHYQKQKQYASTKETRAKRLTDIDF                                    | EGILQLIGGC          |
| hOCT1     | 1   | M-----P-T-----VDDILEQVGES                                            |                     |
| hOCT2     | 1   | M-----P-T-----VDDVLEHGGEF                                            |                     |
| mOCT1     | 1   | M-----P-T-----VDDVLEHVGEF                                            |                     |
| mOCT2     | 1   | M-----P-T-----VDDILEHIGEF                                            |                     |
| consensus | 1   | M                                                                    | p t vddvLehvGef     |
| CeOCT-1   | 37  | CTYQIVFFFLICLPTSLPSAFSAFNIPFVGNPPHTCHIPEGKEYLRP--L-----              |                     |
| CeOCT-2   | 38  | SWQIIVYLLISVQQV-PHAMFNLSVYVMQPDHWCIPFFNEESFSAELGYTNYTWDO             |                     |
| hOCT1     | 15  | GNFQQAFLILCLLSA-AFAPTCVGIVFLGFTPDHHCSPGVAELSQR--CGWS---PAE           |                     |
| hOCT2     | 16  | HEFQKQMFLLALLSA-TFAPIYVGIVFLGFTPDHRCRSPGVAELSRLR--CGWS---PAE         |                     |
| mOCT1     | 15  | GNFQQAFLILCLLSA-SLAPIYVGIVFLGFTPDHHCSPGVAELSQR--CGWS---PAE           |                     |
| mOCT2     | 15  | HLFQKQTEFLALLSG-AFTPIYVGIVFLGFTPNHHCSPGVAELSQR--CGWS---PAE           |                     |
| consensus | 61  | gyfQkq f ilcllsa fapiyvgivflgftPdHhCrsPgvaElsqr cgws pae             |                     |
| CeOCT-1   | 86  | -----TNDT-QILSCKQY----NETQINVFRFTSAPVDYSDRISLVPC                     |                     |
| CeOCT-2   | 97  | VLNSTIAFPRIFNKQRNEL-HHDQCHYFERDVIHIKL---SPW---AQVKDMNATGKINRC        |                     |
| hOCT1     | 69  | ELNYTVPGGLGP---AGEA-FLGQCRRYEVDWNQSAISCVDPL--ASLATNRSHLPLGPC         |                     |
| hOCT2     | 70  | ELNYTVPGEGCP---AGEA-SPRQCRRYEVDWNQSTFDCVDPL--ASLDNRSLPLGPC           |                     |
| mOCT1     | 69  | ELNYTVPGLGS---AGEASFISQCMRYEVDWNQSTLDCVDPL--SSLAANRSHLPLSPC          |                     |
| mOCT2     | 69  | ELNYTVPGLGS---AGEVSFISQCMRYEVDWNQSTLDCVDPL--SSLAANRSHLPLSPC          |                     |
| consensus | 121 | elnytvpglgt agea fl qCkryevdwnqstldcvdpl aslatnrshlpl pC             |                     |
| CeOCT-1   | 126 | QNGWDYDNSTYLDLSLVTEFNLVCDQQAWIEISTSFYVGSFIGNCLFGYADKFGRRRSF          |                     |
| CeOCT-2   | 151 | K-EWEYDTSVMDRTIVTEINRVCDNNWSRAHVHMSYSGLVLCFVGGIISDRYGRKTAI           |                     |
| hOCT1     | 122 | QDGWVYDTP--GSSIVTEFNLVCADSWKLDLFQSCINAGFLFGSLGVGYEADRFRGKLCL         |                     |
| hOCT2     | 123 | RDGWVYFTP--GSSIVTEFNLVCANSWMLDLFQSSVNVGFFIGSMSIGYIADRFRGKLCL         |                     |
| mOCT1     | 123 | EHGWVYDTP--GSSIVTEFNLVCGDAWKDLFQSCVNI GFFIGSLVVGYYIADRFRGKLCL        |                     |
| mOCT2     | 123 | EHGWVYDTP--GSSIVTEFNLCAHSWMLDLFQSLNVNGFFIGAVGIGYIADRFRGKFCL          |                     |
| consensus | 181 | gWvYdtp gssivTEfNlVCaqsW ldlfqssvngGffiGsllvGyiaDrfGRklcl            |                     |
| CeOCT-1   | 186 | FVILTVLIVCTASSFAKIDIESFIILRFFTGLAFPALFOIPFIICMEFMGNSGRIFSGLM         |                     |
| CeOCT-2   | 210 | TGFGIITMIFGILLITYSKEEIEFLVVRFLAATNEAADLAAVYLCMEVTGKRYRSIVGSL         |                     |
| hOCT1     | 180 | LGTVLVNAISGVLMAFSPNYMSMLLFRLLQGLVSKGNWAGYTLITEFVGSGRRTVIM            |                     |
| hOCT2     | 181 | LTTVLINAAAGVLMAISPITYWMLIFRLQGLVSKAGWLIGYILITEFVGRRYRRTVGIF          |                     |
| mOCT1     | 181 | LVTTLVTSISGVLTAAPDYTSMLLFRLLQGLVSKGSWSGYTLITEFVGSYRRTTAIL            |                     |
| mOCT2     | 181 | LVTTLINATSGVLMAISPNYAWMLVFRFLQGLVSKAGWLIGYILITEFVGLGYRRTVGIC         |                     |
| consensus | 241 | lvtllvnavsGvlma spdy smlifR lqglvskaawligyiliteFvGtgyRrtvgim         |                     |
| CeOCT-1   | 246 | TSIFFGAAMALLGVVAMFIREWRQLTFFCNAEFAFYITYYFIPESPRWSVVGKWADAK           |                     |
| CeOCT-2   | 270 | IQAPWACGYAFLALITAYLTKSWTMIHLICVLLHIISLMLLYFIPESPRWLLNKKTKQAE         |                     |
| hOCT1     | 240 | YQMAFTVGLVALTGLAYALPWRWLQAVSLPTFLFLLYYWCVPEsprwllSQKRNTAI            |                     |
| hOCT2     | 241 | YQMAFTVGLVLAGVAYALPWRWLQFTVSLNEFFLLYYWCVPEsprwllSQKNNAEAM            |                     |
| mOCT1     | 241 | YQMAFTVGLVLAGVAYALPDWRWLQAVSLPTFLFLLYYWCVPEsprwllSQKRRTQAV           |                     |
| mOCT2     | 241 | YQMAFTVGLLILAGVAYALPNWRWLQFAVLENECFLLYWCIPESPRWLISQKNNAKAM           |                     |
| consensus | 301 | yqlaftvglvllagvAyalprWrwlq avslp fillyyw l <b>PESPRW</b> lisqnknadAi |                     |
| CeOCT-1   | 306 | KQKKKIAKMNGKSN-VDDELVDMSKNHQNAAEE-KET--KRSHNVTDLFTPNLRRKTL           |                     |
| CeOCT-2   | 330 | KIIREACHYMKSRIPSDLG-----VRHAEEKKKWMKHNEKPSYFHLFRSESLFRNV             |                     |
| hOCT1     | 300 | KIVDHIAQKNGKLPADLKV-----LSLEED-VTE--KLSPSFADLFRTPRLRKRTF             |                     |
| hOCT2     | 301 | RIIKHIAKNGKSLPASLQR-----LRLEEE-TGK--KLNPsfldlVrtpQIRKHTM             |                     |
| mOCT1     | 301 | RIMEQIAQKNRKVPADLKV-----LCLEED-ASE--RRSPSFADLFRTPSLRKHTL             |                     |
| mOCT2     | 301 | KLIKHIAKNGKSVPVSLQS-----LTATED-TGM--KLNPsfldlVrtpQIRKHTL             |                     |
| consensus | 361 | kiikhiakNgkslpadl l 1 leEd klspsf dLfrtpnlRkhtl                      |                     |

|           |     |                                                                |
|-----------|-----|----------------------------------------------------------------|
| CeOCT-1   | 362 | IVTYIVWMNATIIYNGLTINVSNLP-----VDDYWSFIINGAVELPGYFVWPLQCA       |
| CeOCT-2   | 382 | VLFIIVWITATALVYVGMVIALSDQSSPGRRVFDGNFVLNNAMACAELPTLVF-CVFLIRM  |
| hOCT1     | 349 | ILMYLWFTDSVLYQGLIIMHGATS-----GNLYLDFLYSALVEIPGAFIALITIDRV      |
| hOCT2     | 350 | ILMYLWFTSSSVLYQGLIMHMLAG-----DNLYLDFFYLSALVEFPAAFIILITIDRI     |
| mOCT1     | 350 | ILMYLWFSCAVLYQGLIMHVGATG-----ANLYLDFFYSSLVEFPAAFIILVITIDRI     |
| mOCT2     | 350 | ILMYLWFTSSSVLYQGLIMHMLAG-----DNLYLDFFYLSALVEFPAAFIILITIDRI     |
| consensus | 421 | ilmyiWftt vlyQglimhmg g gnlyldffysalvEfPaafiilvtidr            |
| CeOCT-1   | 414 | GRRRTIAATMIVCGIGCVSAFMYP-DGYPLIVASASFIGKFGVGSFAVIYIFAGELYPT    |
| CeOCT-2   | 441 | GRKRSQMLVLFGSGLEFLITSVVMVVRKQSTLALIFMLLSKACTQGSFNILYIFTSEINPT  |
| hOCT1     | 401 | GRITYPNAMSNIAGAACLVMIFIS-PDLHLWLNIIIMCVGRMGITIAIOMICLVNAELYPT  |
| hOCT2     | 402 | GRRYPWAASNMVAGAACLASVFIP-GDLQWLKIIISCLGRMGITIAEIVCLVNAELYPT    |
| mOCT1     | 402 | GRITYPLAASNILVAGAACLIMFIP-HELHLWLNITACLGRMGATIVLCMVCLVNAELYPT  |
| mOCT2     | 402 | GRRYPWAMSNMVAGAACLASVFIP-DDLQWLKIIIVACLGRMGITIAEMVCLVNAELYPT   |
| consensus | 481 | GRryplaasnivaGaacI svfip dl wL iii clgrmgitiafnmvcIvnaELyPT    |
| CeOCT-1   | 473 | VVRALGVMGSSMVAGSGLLLAPHIV-NLGKIVK-ILPLLIMGLMAISAGILTFFLPETLG   |
| CeOCT-2   | 501 | VVRNSAVGIISSMVARNGAGSGYIA-ILSDVTPLVPMTIFACFSLLAGCLVLLLPETQG    |
| hOCT1     | 460 | FVRNLGVMVCSSLCDIGGIITPFIVFRLEVVQ-ALPLILFAVLGLLAAGVTL LLPETKG   |
| hOCT2     | 461 | FIRNLGVHICSSMCDIGGIITPFIVRLINIWL-ELPLMVFGVLGLVAGGLVLLLPETKG    |
| mOCT1     | 461 | FIRNLGMMVCSSALCDIGGIFTPFIVVRLMEVWQ-ALPLILFGVLGLSAGAVTL LLPETKG |
| mOCT2     | 461 | YIRNLAVIVCSSMCDIGGIITPFIVRLTDIWL-EFPLVVFVAVGLVAGGLVLLLPETKG    |
| consensus | 541 | fvRnlgvmvcSsvcdiGgiltpfivfrLsdiwm lPllifgvlglLlAggl lllLPETKg  |
| CeOCT-1   | 531 | APLPMTIEDAENFGKK-PEPDSG--MFTQ-AAKKRESQPL--LE-----              |
| CeOCT-2   | 560 | LPLPPTIILDSVQMVKENTKPCGTLSGTELGGLDDDA-QPYGGKIPPRVSSDDEEEEEED   |
| hOCT1     | 519 | VALPETMKDAENLGRK-AKPKEN--TIYL-KVQTSE--P-----                   |
| hOCT2     | 520 | KALPETIEEAENMCRP-RKNKEK--MIYL-QVQKLE-----H-----                |
| mOCT1     | 520 | VALPETIEEAENLGRKSKAKEN--TIYL-QVQTGK-----S-----                 |
| mOCT2     | 520 | KALPETIEDAEKMCORP-RKKKEK--RIYL-QVKKAE-----H-----               |
| consensus | 601 | laLPeTiedaenmgrk kpke iyl qvqk e l                             |
| CeOCT-1   | 569 | ----PHTPMDRRRRSSRLMNI                                          |
| CeOCT-2   | 619 | SEESIPEKTA-----                                                |
| hOCT1     | 552 | ----SGT-----                                                   |
| hOCT2     | 553 | ----PLN-----                                                   |
| mOCT1     | 554 | ----PHT-----                                                   |
| mOCT2     | 553 | ----S-----                                                     |
| consensus | 661 | p t                                                            |

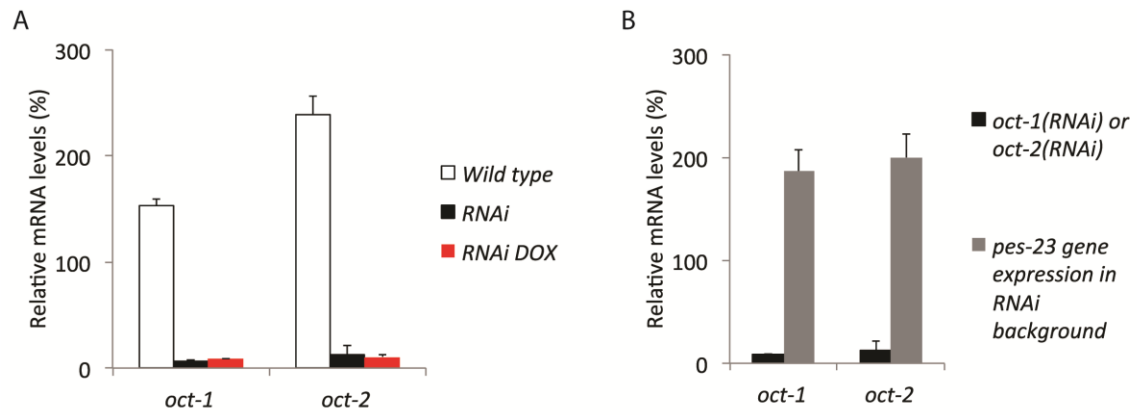

**Figure S2.** Relative gene expression. (A) *oct-1* and *oct-2* gene expression are downregulated by the *oct-1(RNAi)* and *oct-2(RNAi)*, respectively. (B) *pes-23* gene expression is not affected by either *oct-1(RNAi)* and *oct-2(RNAi)*. The RNA expression was measured as described in the experimental procedures.

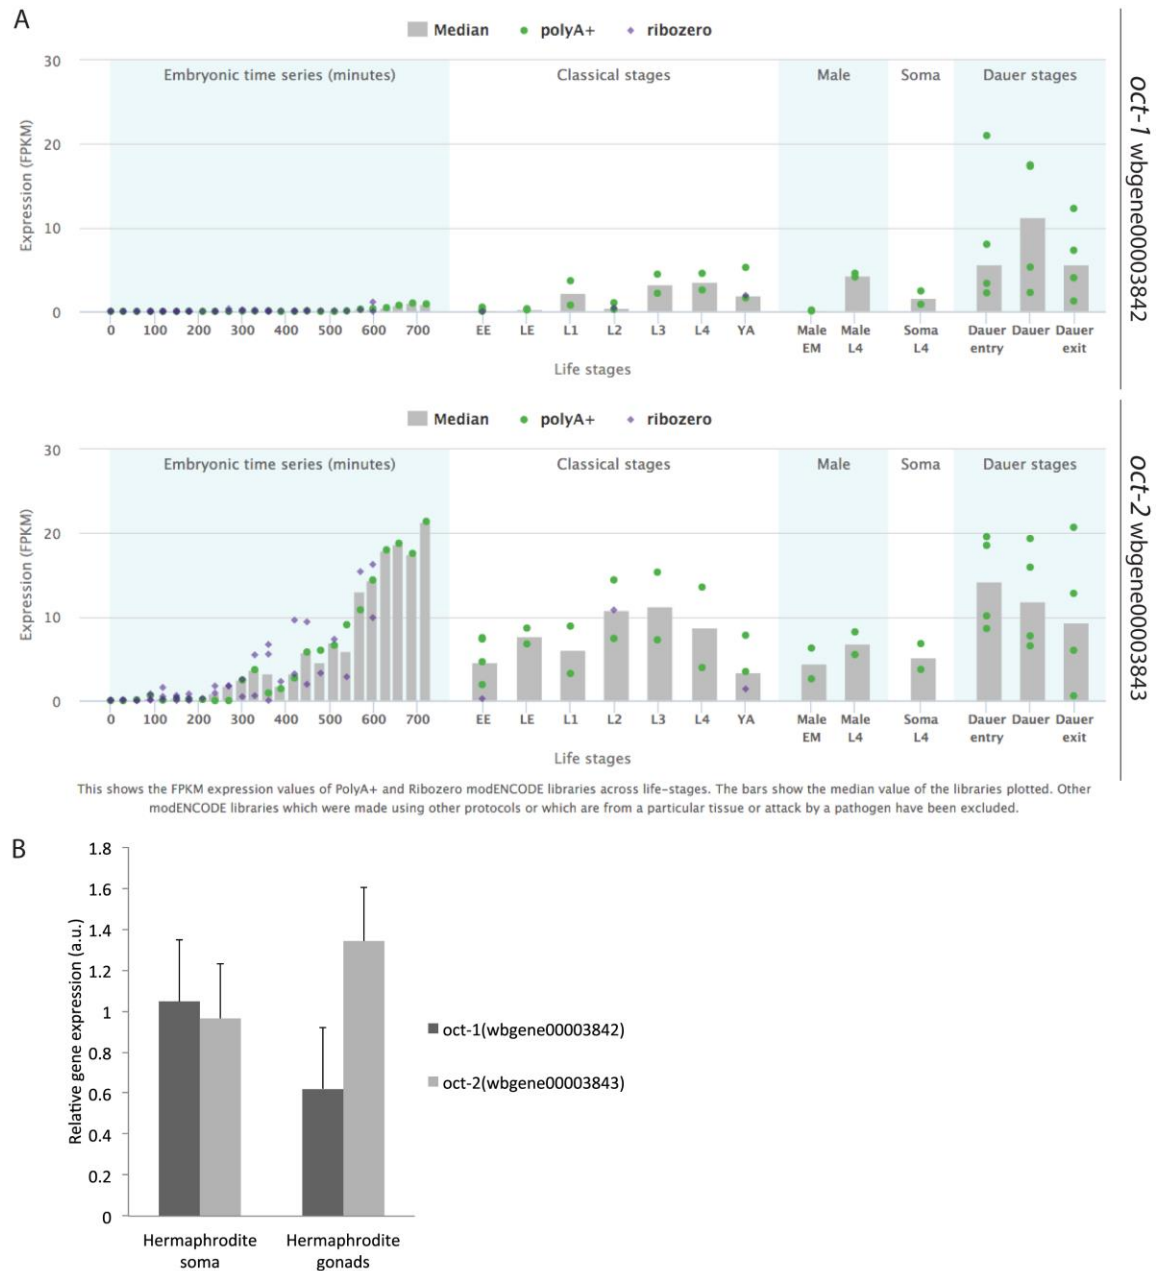

**Figure S3.** *oct-1* and *oct-2* gene expression data measured (A) across all developmental stages and (B) hermaphrodite soma and hermaphrodite gonads. The *oct-1* (WBGene00003842) and *oct-2* (WBGene00003843) RNA expression data was extracted from the Wormbase/SPELL database.

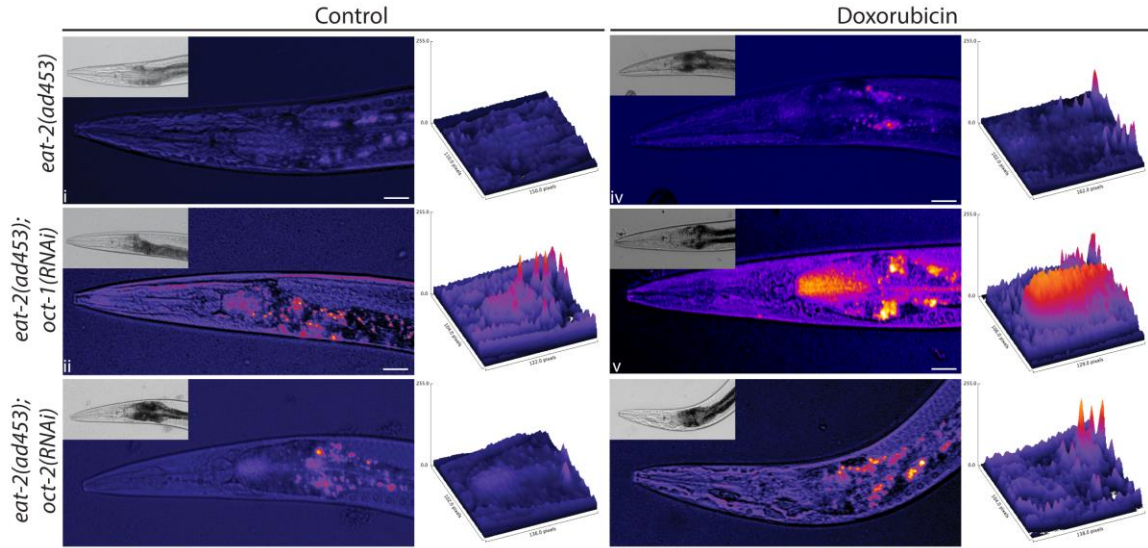

**Figure S4.** OCT-2-dependent doxorubicin uptake into the pharynx of *C. elegans* is not affected by the eating defective *eat-2(ad453)* mutant animals. Experiment is represented by ‘fire’ look-up images of the pharynx from eating defective *eat-2(ad453)* untreated and doxorubicin treated animals. The respective DIC images are shown in the upper left corner of each panel. Images to the right of each pharynx depict a 3D representation of the doxorubicin (100  $\mu$ M) treatment signal intensity for the indicated genotypes. Data are representative of experiments performed in duplicates ( $n = 15$ ). Enlargement of the pharynx is represented by a scale bar = 10  $\mu$ m. Fluorescence posterior to the pharynx is auto-fluorescence detected from the intestine.

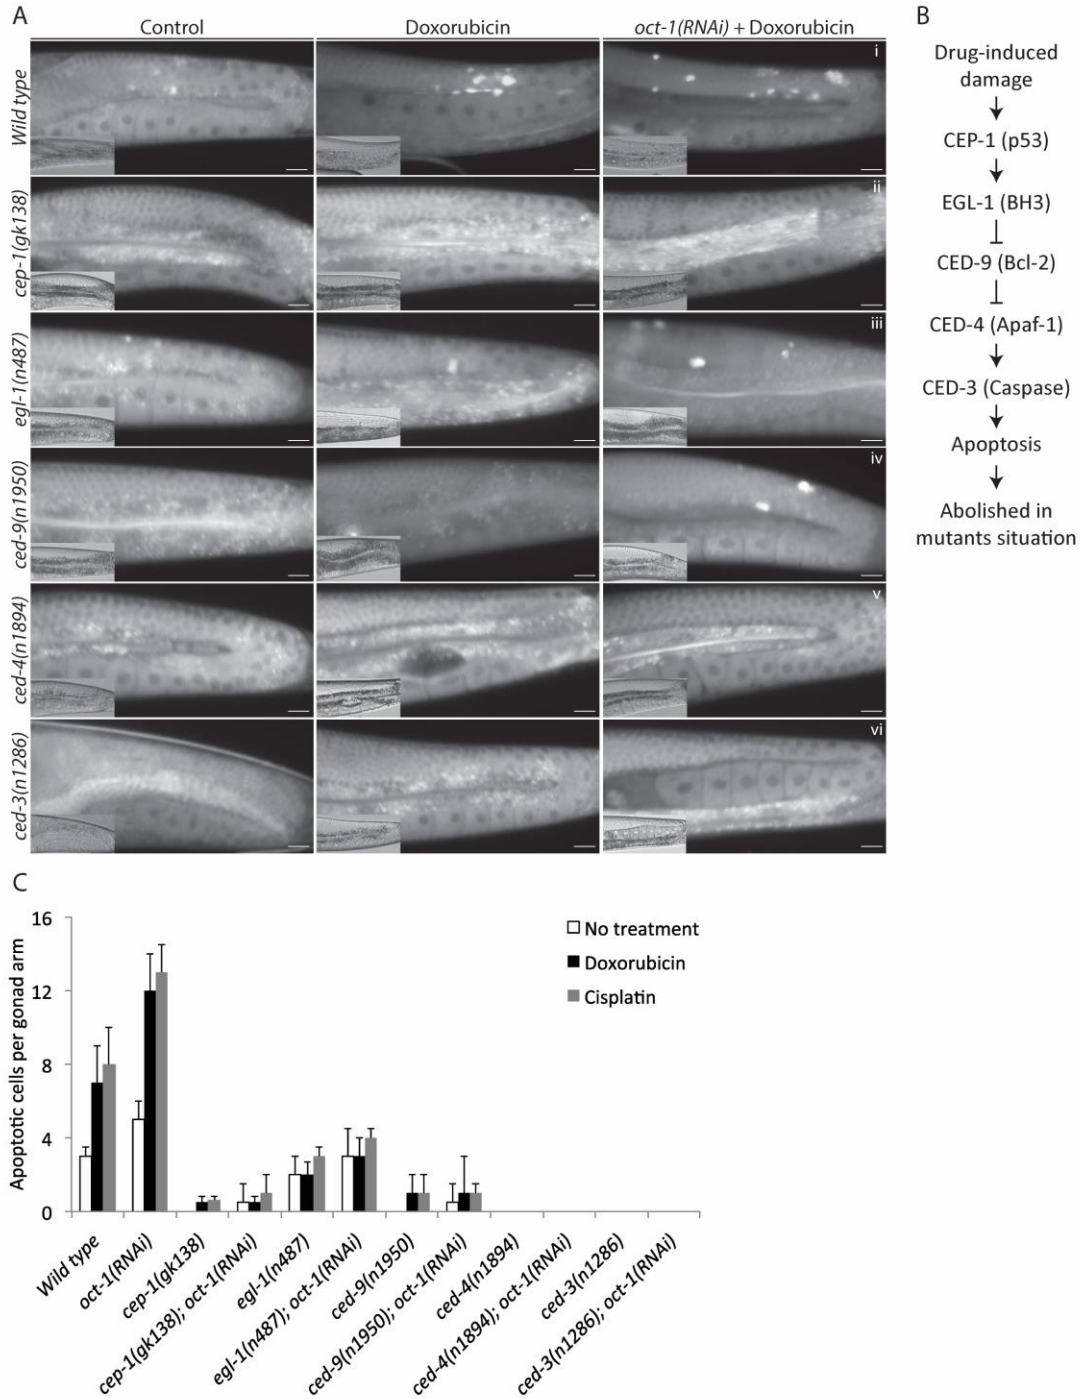

**Figure S5.** Genetic analysis of doxorubicin- and cisplatin-induced apoptotic cell death. (A) Representative images of wild type\*, *cep-1*, *egl-1*, *ced-9*, *ced-4* and *ced-3* mutant animals untreated and RNAi-driven depletion of *oct-1* exposed to 100  $\mu$ M doxorubicin. Apoptotic cells were observed and quantified as described in the experimental procedures. (B) Apoptotic pathway in *C. elegans* (C) Data shown represent the average quantification of three independent experiments (n =30). \*Images from Figure 2 were used for comparison purposes.

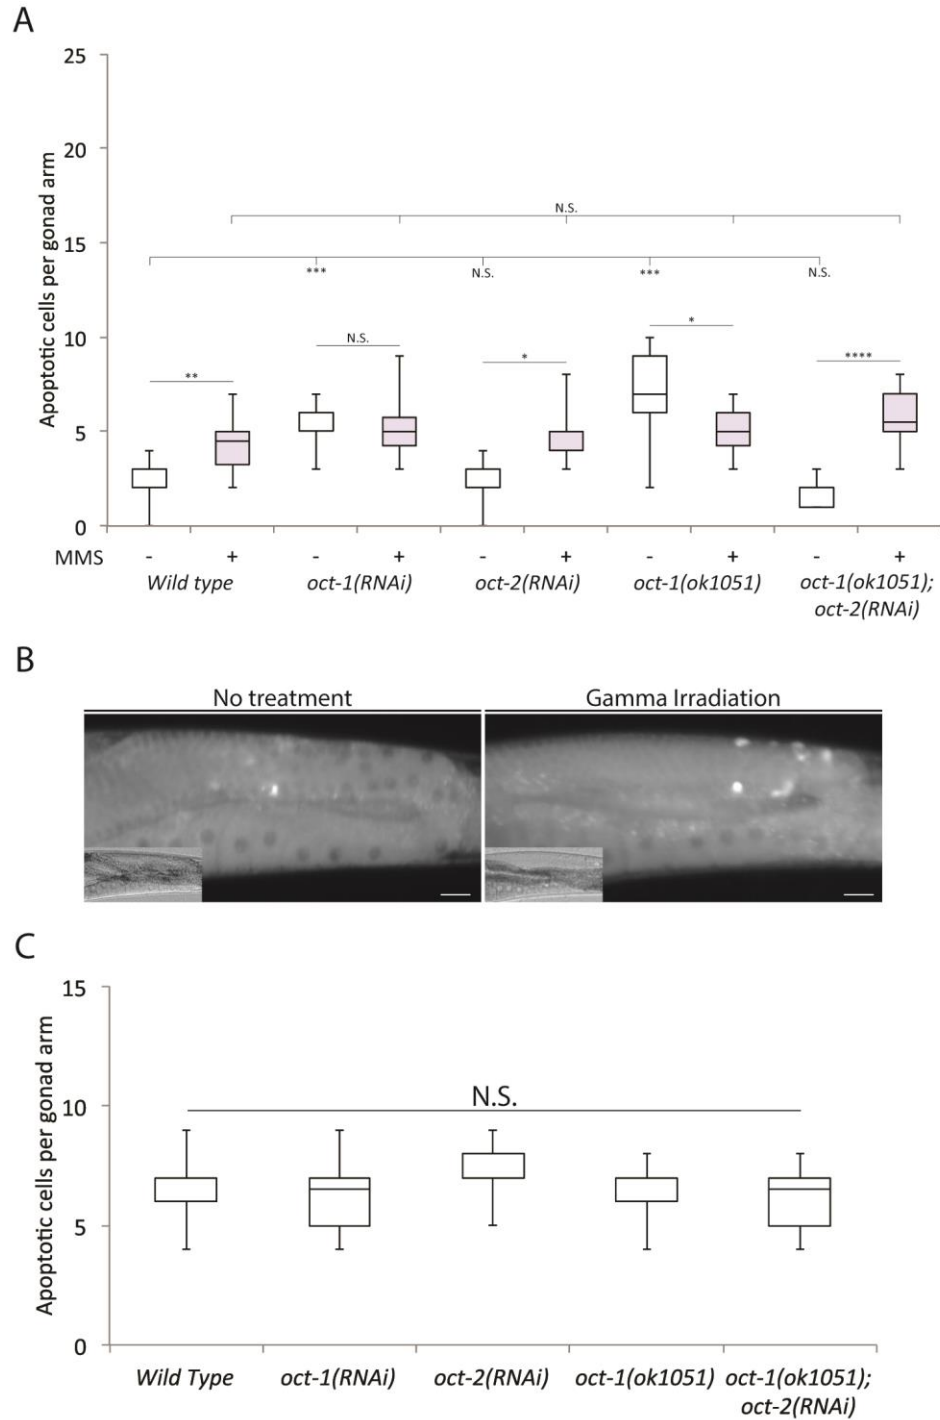

**Figure S6.** Methyl methanesulfonate and Gamma rays ( $\gamma$ -rays)-induced germ cell apoptosis are independent of OCT-1 and OCT-2 function. (A and C) Box and whisker plots depict quantification of apoptotic cell corpses upon MMS (0.25  $\mu$ M) and  $\gamma$ -rays (75 grays) treatment, respectively. (B) Representative images of right gonad arms after exposure to  $\gamma$ -rays. Posterior is right. The results are the averages from three independent experiments (n = 30) Mann-Whitney U-test (\* $P$ <0.05; \*\* $P$ <0.01; \*\*\* $P$ <0.001; \*\*\*\* $P$ <0.0001 and N.S. = Non Significant).

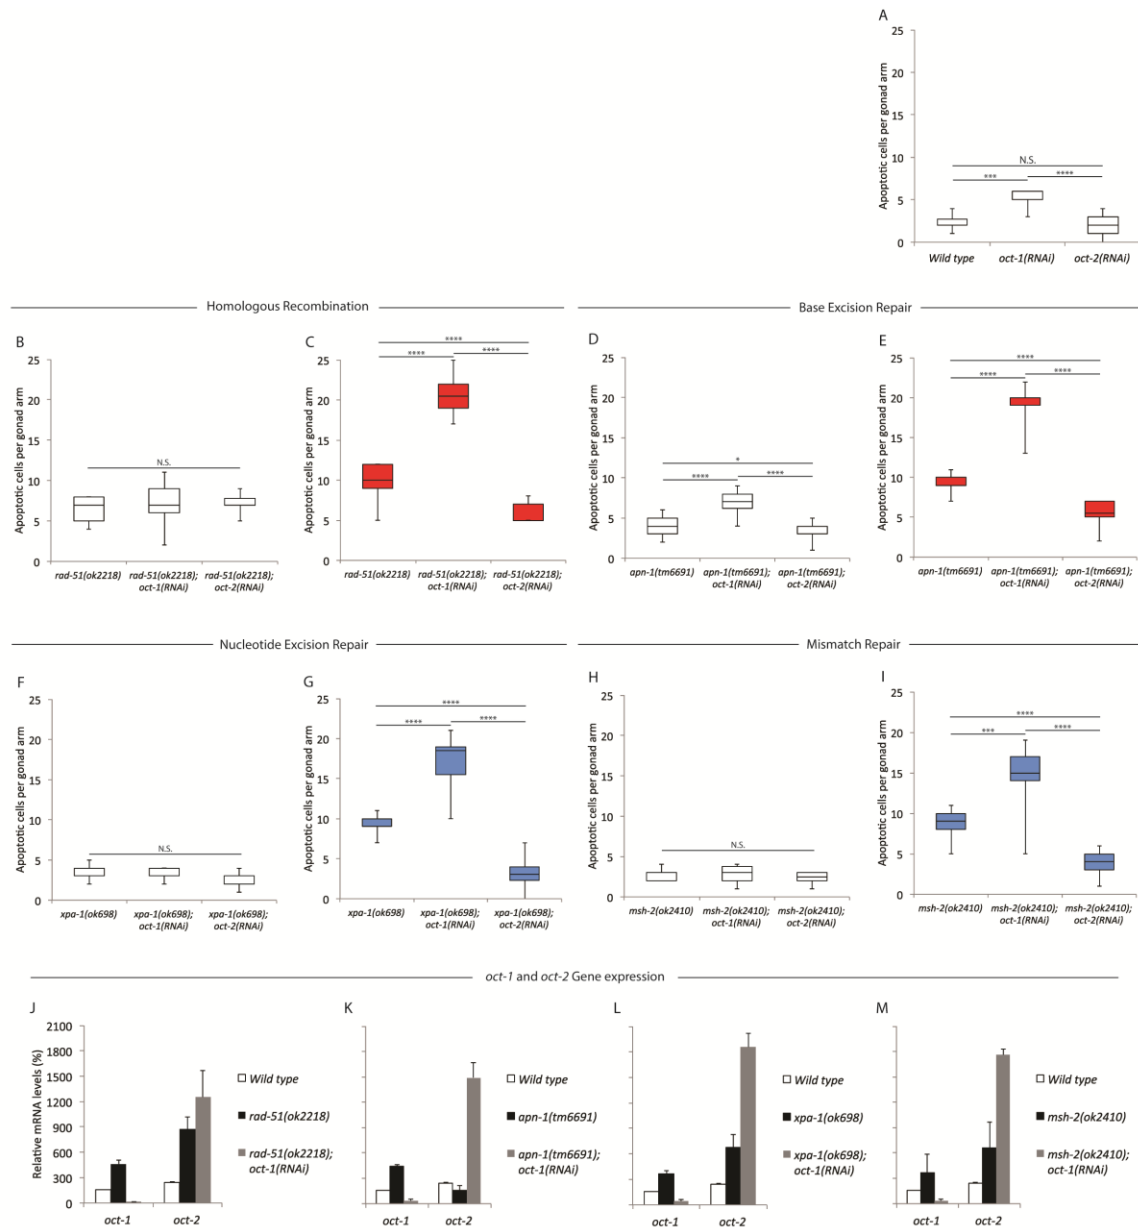

**Figure S7.** RNAi-driven downregulation of *oct-1* upregulates *oct-2* expression and sensitizes *C. elegans* DNA repair deficient mutants to drug-induced apoptotic cell death. (A) Wild type. (B and C) The homologous recombination mutant *rad-51(ok2218)* downregulated for *oct-1* shows stimulated doxorubicin-induced apoptotic cell death. (D and E) The base excision repair mutant *apn-1(tm6691)* downregulated for *oct-1* displays enhanced spontaneous, as well as doxorubicin-induced apoptotic cell death. (F and G and H and I) The nucleotide excision and mismatch repair defective mutants, *xpa-1(ok698)* and *msh-2(ok2410)*, respectively, downregulated for *oct-1* exhibit enhanced cisplatin-induced apoptotic cell death. Treatment with doxorubicin (100  $\mu$ M, red boxes) and

cisplatin (100  $\mu$ M, blue boxes) started with L1-staged animals. Apoptotic cell corpses were analysed in young adult staged animals. Untreated animals are depicted as white boxes. The results are the averages from three independent experiments (n = 30 each). Mann-Whitney U-test of mean difference (\*P<0.05; \*\*P<0.01; \*\*\*P<0.001 and \*\*\*\*P<0.0001) was calculated. (J - M) RNAi-driven downregulation of *oct-1* upregulates *oct-2* in the wild type and the DNA repair defective mutants. The Y-axis represents the same scale for *oct-1* and *oct-2* gene expression in all genotypes.

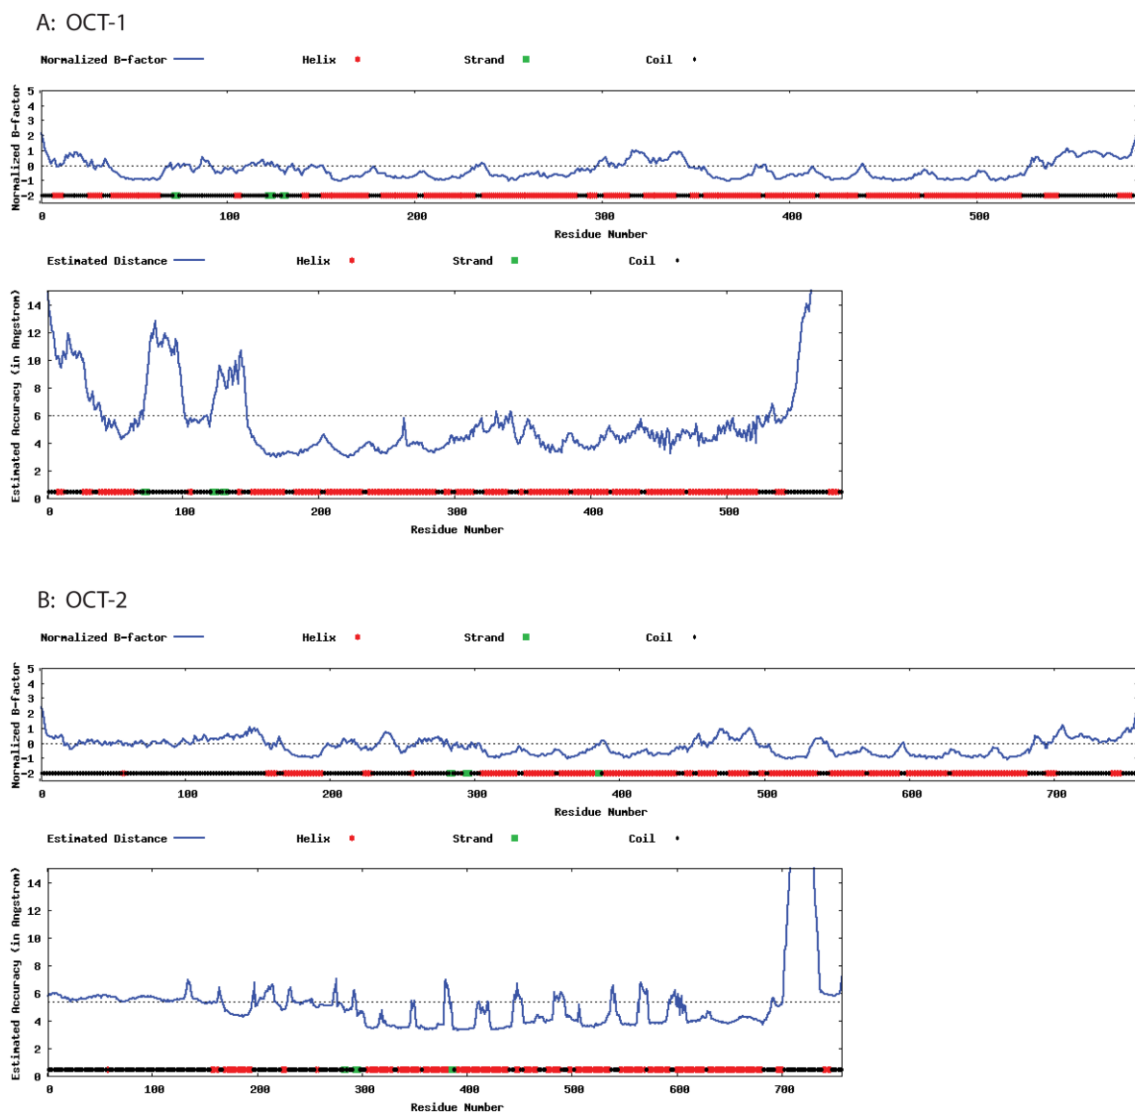

**Figure S8.** Structural modeling prediction of (A) OCT-1 and (B) OCT-2 computed with ResQ. The predicted Normalized B-factor and estimated residues accuracy in Ångstrom were computed based on the I-TASSER models. The twelve transmembrane domains are represented as red bars at the bottom of each panel.

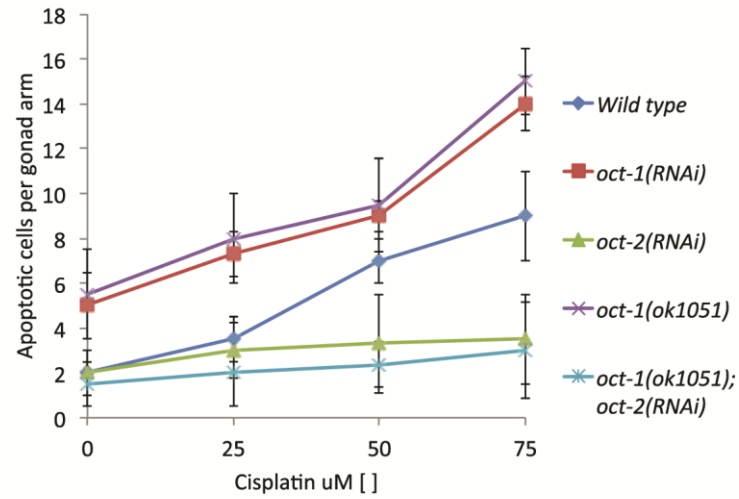

**Figure S9.** Apoptotic cell corpses as a function of cisplatin concentrations. At 25  $\mu$ M of cisplatin, apoptotic cell corpses were induced in the *oct-1(ok1051)* mutant, but not in the wild type.
